# Identification and Function of Myeloid Differentiation Factor 88 (MyD88) in *Litopenaeus vannamei*

Shuang Zhang<sup>1</sup>, Chao-Zheng Li<sup>1</sup>, Hui Yan<sup>1</sup>, Wei Qiu<sup>1</sup>, Yong-Gui Chen<sup>2</sup>, Pei-Hui Wang<sup>1</sup>, Shao-Ping Weng<sup>1</sup>, Jian-Guo He<sup>1,2\*</sup>

**1** MOE Key Laboratory of Aquatic Product Safety/State Key Laboratory of Biocontrol, School of Life Sciences, Sun Yat-sen University, Guangzhou, People's Republic of China, **2** School of Marine Sciences, Sun Yat-sen University, Guangzhou, People's Republic of China

## Abstract

Myeloid differentiation factor 88 (MyD88) is a universal and essential signaling protein in Toll-like receptor/interleukin-1 receptor-induced activation of nuclear factor-kappa B. In this study, two MyD88 protein variants (LvMyD88 and LvMyD88-1) were identified in *Litopenaeus vannamei*. The LvMyD88 cDNA is 1,848 bp in length and contains an open reading frame (ORF) of 1,428 bp, whereas the LvMyD88-1 cDNA is 1,719 bp in length and has an ORF of 1,299 bp. Both variants encode proteins with death and Toll/interleukin-1 receptor domains and share 91% sequence identity. In healthy *L. vannamei*, the LvMyD88 genes were highly expressed in hemocytes but at a low level in the hepatopancreas. The LvMyD88s expression was induced in hemocytes after challenge with lipopolysaccharide, CpG-ODN2006, *Vibrio parahaemolyticus*, *Staphylococcus aureus*, and white spot syndrome virus, but not by poly I:C. Overexpression of LvMyD88 and LvMyD88-1 in *Drosophila Schneider* 2 cells led to activation of antimicrobial peptide genes and wsv069 (ie1), wsv303, and wsv371. These results suggested that LvMyD88 may play a role in antibacterial and antiviral response in *L. vannamei*. To our knowledge, this is the first report on MyD88 in shrimp and a variant of MyD88 gene in invertebrates.

**Citation:** Zhang S, Li C-Z, Yan H, Qiu W, Chen Y-G, et al. (2012) Identification and Function of Myeloid Differentiation Factor 88 (MyD88) in *Litopenaeus vannamei*. PLoS ONE 7(10): e47038. doi:10.1371/journal.pone.0047038

**Editor:** Sebastian D. Fugmann, National Institute on Aging, United States of America

**Received:** May 26, 2012; **Accepted:** September 7, 2012; **Published:** October 12, 2012

**Copyright:** © 2012 Zhang et al. This is an open-access article distributed under the terms of the Creative Commons Attribution License, which permits unrestricted use, distribution, and reproduction in any medium, provided the original author and source are credited.

**Funding:** This research was supported by the National Natural Science Foundation of China under Grant No. U1131002, the National High Technology Research and Development Program of China (973 Program) 2012CB114401, the China Agriculture Research System, the Special Fund for Agro-scientific Research in the Public Interest 201103034, the Foundation of Administration of Ocean and Fisheries of Guangdong Province A201101B02, the Open Project of the State Key Laboratory of Biocontrol (SKLBC09K04) and the Foundation of Science and Technology Bureau of Guangdong Province (2011A 020102002 and 2009A 020102002). The funders had no role in study design, data collection and analysis, decision to publish, or preparation of the manuscript.

**Competing Interests:** The authors have declared that no competing interests exist.

\* E-mail: lsshjg@mail.sysu.edu.cn

## Introduction

Innate immunity is the first-line of host defense in multicellular organisms against infectious pathogens [1] and is activated upon recognition of microbial derived pathogen-associated molecular patterns (PAMPs) by host pattern recognition receptors (PRRs) [2]. Toll-like receptors (TLRs), an important family of the PRRs which are well characterized in vertebrates, initiate a signaling cascade which leads to activation of the Myeloid differentiation factor 88 (MyD88) and the transcription factor nuclear factor-kappaB (NF-κB) [3–5]. MyD88 consists of a Toll/interleukin-1 receptor (TIR) domain and a death domain and is the common signaling adaptor protein shared by all TLRs except TLR3 [6–8]. The TIR domain is essential to the interactions between TLRs and MyD88. The death domain, in turn, associates with the death domain of interleukin-1 receptor associated kinase (IRAK), to trigger downstream signaling cascades that lead to the activation of the NF-κB [9–11].

MyD88 was first identified in 1990 [12] and has been extensively studied in many species, including human [13], porcine [14], mouse [15], chicken [16], reptiles [17,18], fish [19–26], scallop [27] and flies [28]. To date, variants of MyD88 have been reported only in several vertebrates such as humans [29], mice [30] and chicken [18]. Recent studies have shown that

MyD88 genes are duplicated in common carp [25]. Although the MyD88 gene has been sequenced in diplostroaca and anostraca [31] little is known about its existence in penaeidae.

The Pacific white shrimp, *Litopenaeus vannamei*, is distributed along the Pacific coast ranging from the Gulf of California to the northern Peru and has become one of the most important economic penaeid shrimps worldwide, particularly in the Eastern Pacific region and Asia [32]. With rapid expansion of farming, bacterial and viral diseases have become a major concern, causing substantial economic losses in many countries since the 1990s [33–35]. For example, the white spot syndrome virus (WSSV) is one of the most common and destructive pathogen and is able to cause 100% mortality within 3 days to 10 days after infection [36]. Study on the *L. vannamei* immune system is much needed in order to design better strategies for disease prevention and control.

Our previous studies suggest that a signaling cascade similar to the TLR/MyD88/Tube/Pelle/TRAF6/NF-κB pathway may exist in *L. vannamei*, and could be activated by wsv449, to upregulate the expression of wsv069 (ie1), wsv303, and wsv371 [37]. Several key genes in this pathway, including the Toll genes, the Pelle gene, the TRAF6 gene, and the Rel/NF-κB homologous genes (Dorsal and Relish), have been characterized [37–42]. In this study, two variants of the MyD88 gene were identified in *L.*

*vannamei* and their function was studied in signal transduction in response to different stimuli.

## Materials and Methods

### Microorganisms

Gram-negative *Vibrio parahaemolyticus* were cultured in a thiosulfate-citrate-bile salts-sucrose (TCBS) agar culture medium at 30°C for 18 h. Gram-positive *Staphylococcus aureus* were cultured in a nutrient broth agar at 37°C for 24 h. The *V. parahaemolyticus* and *S. aureus* cells were centrifuged at 5000 g for 10 min at 4°C, washed with 1×PBS (8 g NaCl, 0.2 g KCl, 1.44 g Na<sub>2</sub>HPO<sub>4</sub>, and 0.24 g K<sub>2</sub>HPO<sub>4</sub>, diluted with dH<sub>2</sub>O to 1 litre and with the pH adjusted to 7.3), and then resuspended in 1×PBS. The bacterial concentration was quantified as the microbial colony-forming units per milliliter (CFU/ml) and the bacterial solution adjusted to 10<sup>6</sup> CFU/ml.

The WSSV-infected *L. vannamei* were collected from the Hengxing shrimp farm in Zhanjiang, Guangdong Province, China, and stored at -80°C. Muscle samples (0.1 g) from the WSSV-infected *L. vannamei* were homogenized in 1 ml of 1×PBS and centrifuged at 5000 g for 15 min at 4°C. The supernatant was filtered through a 0.45 µm membrane, and used as the WSSV inocula.

### Total RNA isolation, cDNA synthesis, and genomic DNA preparation

*L. vannamei* (~8 g to 10 g each) was purchased from a shrimp market in Guangzhou, Guangdong Province, China. The RNeasy Mini Kit (Qiagen, Germany) was used to extract the total RNA from tissue samples. Residual genomic DNA was removed by RNase-free DNase I (Qiagen, Germany). The total RNA was then reverse-transcribed into first strand cDNA using a PrimeScript™ 1st Strand cDNA Synthesis Kit (TaKaRa, China) for gene cloning. For real-time quantitative polymerase chain reaction (qPCR) analysis, the cDNA samples were prepared using the PrimeScript™ RT reagent kit (TaKaRa, China). The cDNA template for the rapid amplification of the cDNA ends (RACE) PCR was prepared using the SMARTer™ RACE cDNA amplification kit (Clontech, USA). Genomic DNA was extracted from muscle samples using the Universal Genomic DNA Extraction Kit (TaKaRa, China).

### Cloning the cDNA and genome of LvMyD88

Degenerate primers for cloning of LvMyD88, DPMMyD88F and DPMMyD88R (Table 1), were designed from conserved regions of the published MyD88 nucleotide sequences of *Tribolium castaneum* (EFA01304), *Drosophila melanogaster* (NP\_610479), *Mus musculus* (NP\_034981) and *Homo sapiens* (AAB49967). A cDNA fragment of LvMyD88 was initially amplified by PCR with degenerate primers using hemocytes derived cDNA. Based on the cDNA fragment, the full-length MyD88 cDNA was obtained via the 5' and 3'RACE PCR as described previously [42]. Briefly, 5' RACE1 and 3' RACE1 primers (Table 1) were used for the first round 5'-end and 3'-end RACE-PCR, respectively, using the following program: 94°C for 3 min, 10 cycles of 94°C for 20 s, 62°C for 30 s (a decrease of 0.5°C per cycle), 72°C for 2 min, 30 cycles of 94°C for 20 s, 57°C for 30 s, 72°C for 2 min, and a final extension at 72°C for 10 min. These PCR conditions were also applied to the second-round 5'-end and 3'-end RACE PCR where 5' RACE2 and 3' RACE2 primers were used respectively. The genomic DNA sequences of LvMyD88 were obtained by PCR using the genomic DNA (the primers are listed in Table 1) using the following program: 94°C for 3 min, 34 cycles of 94°C for 30 s,

**Table 1.** PCR primers.

| Primers                        | Primer sequences (5'-3')                 |
|--------------------------------|------------------------------------------|
| <b>For cDNA cloning</b>        |                                          |
| DPMMyD88F <sup>a</sup>         | CTGTACGCCACGMNGAYA                       |
| DPMMyD88R <sup>a</sup>         | ADTAGGGACGTAGATGTTCTTG                   |
| 5' RACE1                       | CACCGCTCCATGATGAGTTTAAAC                 |
| 5' RACE2                       | CACCAATAAGGTCTCTGTTCTTGTG                |
| 3' RACE1                       | CTGCTGTGATAAGTTTCTGCCA                   |
| 3' RACE2                       | TAGGGCAAAGGGCTATTGGAAC                   |
| <b>For Genomic DNA cloning</b> |                                          |
| GLvMyD88-F1                    | TCGGGAAGAAGTGGCAGAG                      |
| GLvMyD88-R1                    | CTACAGTAAGAATTTGGCTATCTT                 |
| GLvMyD88-F2                    | TTGACCAGAGGGTCCACAGGTAG                  |
| GLvMyD88-R2                    | CCGCTCCATGATGAGTTTAAACA                  |
| GLvMyD88-F3                    | GGCAACCACAAAATACTC                       |
| GLvMyD88-R3                    | CAACCTTAGTATATAGATGCTCCAGTC              |
| GLvMyD88-F4                    | ATGAATTGTGATAAATTTGC                     |
| GLvMyD88-R4                    | GGAAAACCCTGCATTGCC                       |
| <b>For Protein expression</b>  |                                          |
| pAcLvMyD88-F <sup>b</sup>      | CCG <b>CTCGAG</b> ATGTCATTTTCGTCGGGAAGA  |
| pAcLvMyD88-R <sup>b</sup>      | CGGG <b>GGCCCC</b> CCAGGAATTTTGATTTTTTTC |
| <b>For qPCR</b>                |                                          |
| LvMyD88-F1                     | GCTGTCCACCGCCATTT                        |
| LvMyD88-R1                     | GCATCATAGTGCTGTAGTCCAAGA                 |
| LvMyD88-F2                     | GGCAAAGGGCTATTGGAACACTAT                 |
| LvMyD88-R2                     | ATGATCCAGACACCTCTCGTATTC                 |
| LvEF1α-F1                      | AAGGCCCTCAAGAAGAAGTAAAT                  |
| LvEF1α-R1                      | TTGACAACCATACCTGGCTTC                    |
| LvEF1α-F2                      | TGCACCACGAAGCCCTTAC                      |
| LvEF1α-R2                      | CAGGGTGGTTGAGGACGATC                     |

<sup>a</sup>M = A or C; N = A, C, G or T/U; Y = C or T; D = not C.

<sup>b</sup>Nucleotides in bold represent the restriction sites introduced for cloning.

doi:10.1371/journal.pone.0047038.t001

57°C for 30 s, 72°C for 3 min, followed by a final extension at 72°C for 10 min. The PCR products were cloned into the pMD-20 vector (Takara, Japan) and sequenced. The gene sequences obtained in this study have been deposited in the NCBI GenBank (<http://www.ncbi.nlm.nih.gov/genbank/>).

### Bioinformatics analysis

The BLAST program (<http://www.ncbi.nlm.nih.gov/BLAST/>) was used to analyze the nucleotide sequences and to search for protein sequences in the databases. Multiple sequence alignment was generated using the ClustalX 2.0 program (<http://www.ebi.ac.uk/tools/clustalw2>). The simple modular architecture research tool (SMART, <http://smart.embl-heidelberg.de>) was used to analyze the protein domain topology. The neighbor-joining phylogenetic trees were constructed based on the amino acid sequences using the MEGA 4.0 software (<http://www.megasoftware.net/index.html>) and bootstrapped for 1000 times.

### Immune challenge and gene expression analysis

Twelve tissues, including the hemocytes, hepatopancreas, gill, heart, stomach, pyloric caecum, nerve, epithelium, eyestalk,

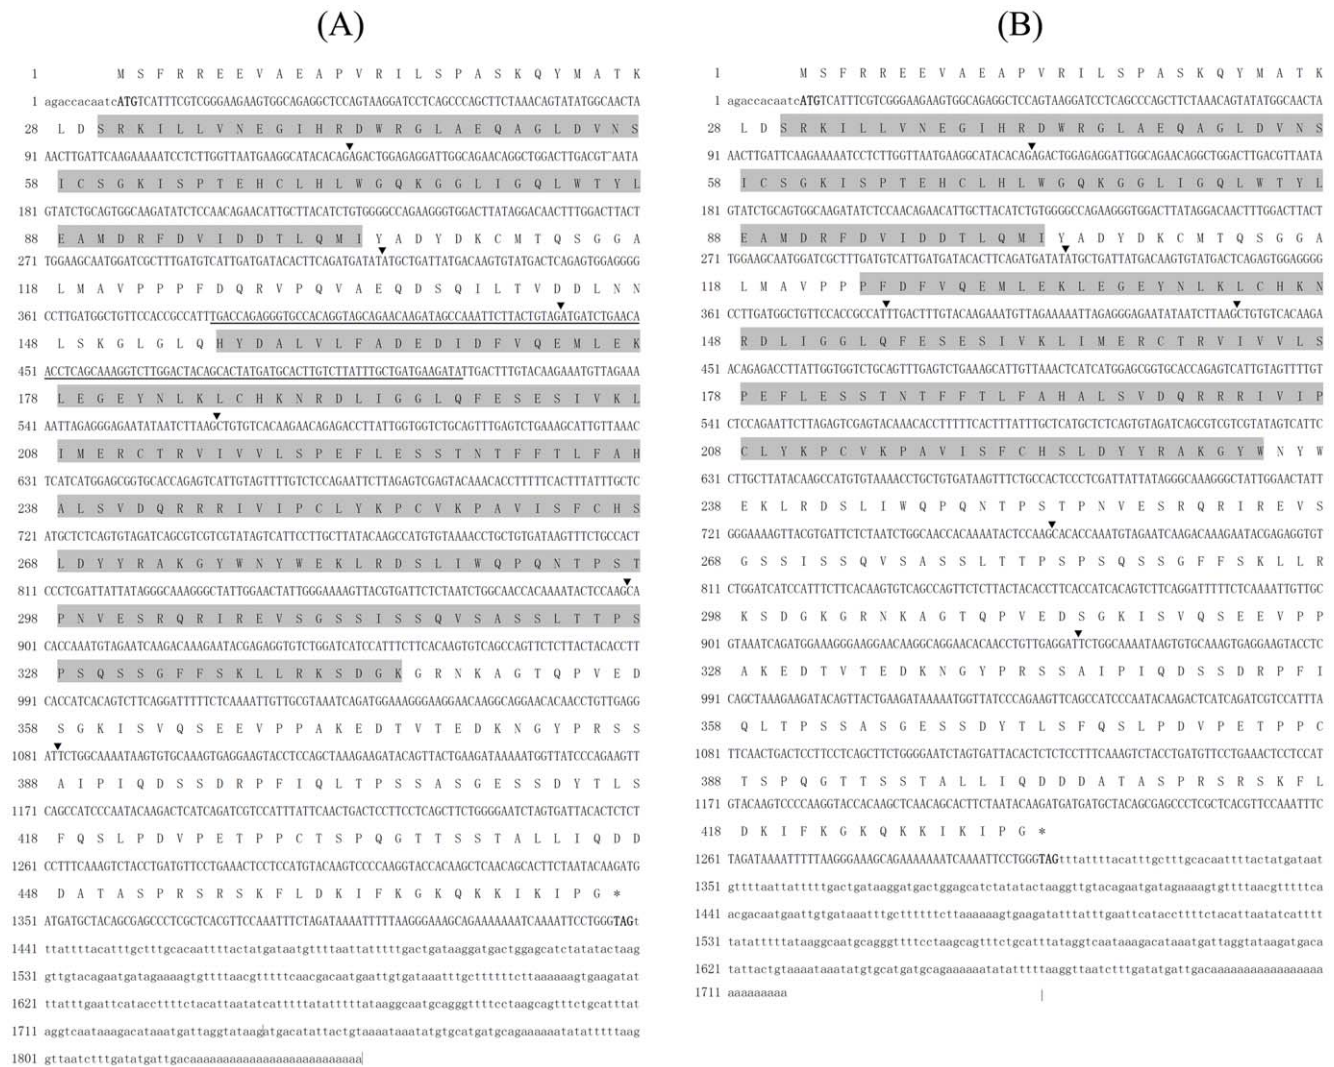

**Figure 1. Nucleotide and deduced amino acid sequences of (A) LvMyD88 and (B) LvMyD88-1 from *Litopenaeus vannamei*.** The nucleotide (lower row) and deduced amino acid (upper row) sequences are shown and numbered on the left. The translation initiation codon (ATG) and stop codon (TAA or TGA) are in bold. The N-terminal death domain (DD, residues 30–103) and C-terminal Toll/interleukin-1 receptor (TIR) domains (residues 156–345 and 124–234 in LvMyD88 and LvMyD88-1, respectively) are shaded. The nucleotides that are absent in LvMyD88-1 were underlined. ▼ denote the exon-exon boundaries.  
doi:10.1371/journal.pone.0047038.g001

intestine, seminal vesicle and muscle, were obtained from healthy *L. vannamei* for RNA extraction. For the reason that there were no specific primers to detect the expression level of LvMyD88-1, the expression level of LvMyD88 and LvMyD88s (the amount of LvMyD88 and LvMyD88-1) were investigated using primers LvMyD88-F1/LvMyD88-R1 and LvMyD88-F2/LvMyD88-R2, respectively. On the basis, the expression level of LvMyD88-1 was calculated using the method put forward by Pfaffl [43]. The PCR was performed in a LightCycler (Roche) with the following program: one cycle at 95°C for 30 s, 40 cycles of 95°C for 5 s, 57°C for 30 s, and 78°C for 5 s. Three replicate qPCRs were performed per sample. Elongation factor 1α (EF1α) was used as the internal control.

For the challenge experiments, healthy *L. vannamei* was intramuscularly injected with LPS (2 µg/g), poly I:C (2 µg/g), CpG-ODN2006 (2 µg/g), *V. parahaemolyticus* (5.5 × 10<sup>6</sup> CFU/g), *S.*

*auress* (2.5 × 10<sup>6</sup> CFU/g), or WSSV (10<sup>6</sup> copies/g) at the third abdominal segment. *L. vannamei* injected with PBS were used as controls. At 0, 4, 8, 12, 24, 36, 48, and 72 h post-injection, three animals from each group were randomly sampled for hemocyte collection. The relative mRNA expression of the LvMyD88 genes was detected by qPCR use the same program described above.

**Plasmid construction**

For protein expression in *Drosophila* Schneider 2 (S2) cells, pAc5.1/V5-His A (Invitrogen, USA) and the PCR products amplified with pAcLvMyD88F and pAcLvMyD88R were digested with restriction enzymes Kpn I and Apa I (Takara, Japan) and purified. The mixture was ligated at 4°C overnight and then transformed into the DH5α competent cells. Positive clones were confirmed by colony PCR and sequenced. In our previous studies [37–42], several luciferase reporter vectors were constructed using

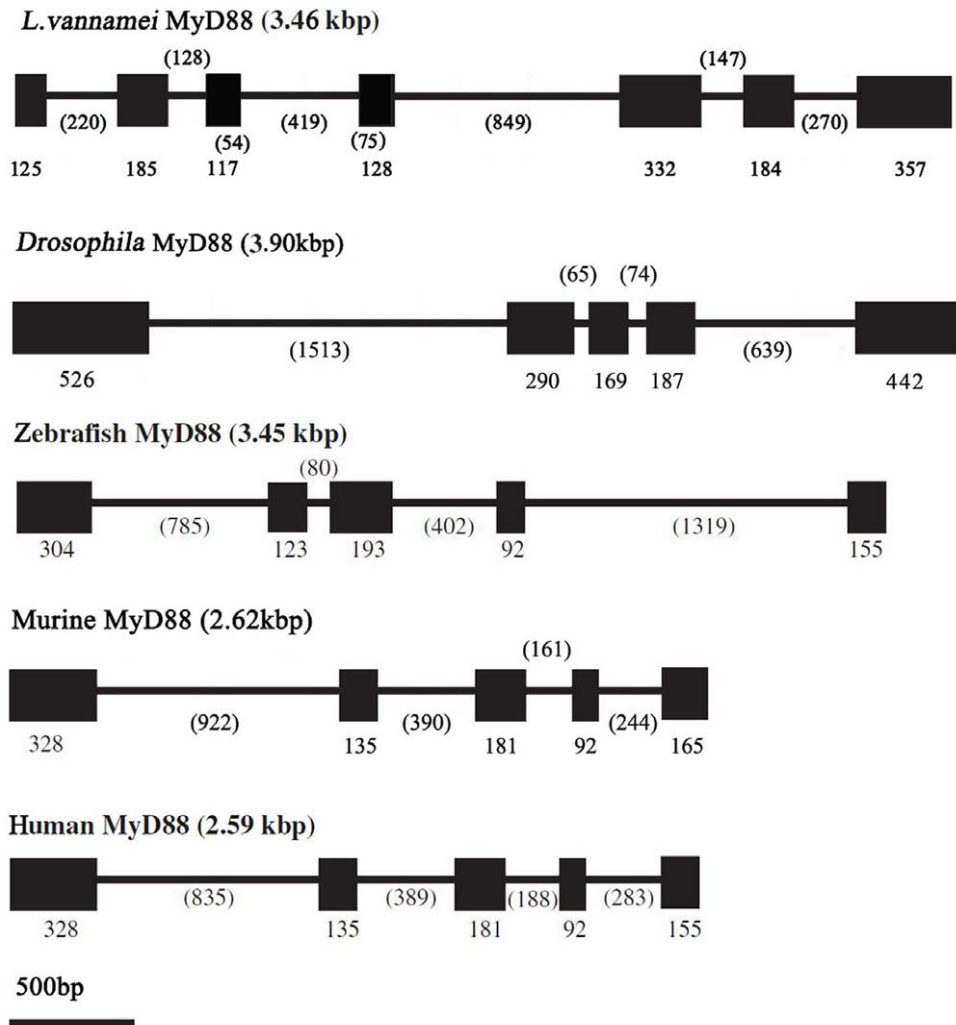

**Figure 2. Comparison of the MyD88 gene structures in *L. vannamei*, *Drosophila*, zebrafish, chicken, mouse, and human.** Boxes in represent exons, and the numbers indicate the length (bp) of the exons and introns.  
doi:10.1371/journal.pone.0047038.g002

the promoter sequences of following genes: the *Drosophila* AMPs, Attacin A (AttA), Drosomyacin (Drs), and Metchnikowin (Mtk); the *L. vannamei* AMP Penaeidin4 (PEN4); the *Penaeus monodon* AMP Penaeidin (PEN309, PEN453, and PEN536); and wsv069 (ie1), wsv303, and wsv371. Luciferase reporter genes, including pGL3-AttA, pGL3-Drs, pGL3-Mtk, pGL3-PEN4, pGL3-PEN309, pGL3-PEN453, pGL3-PEN536, pGL3-wsv069, pGL3-wsv303, and pGL3-wsv371, have been shown to be regulated through NF-κB activation [37,39,40,44–46].

#### Dual-luciferase reporter assay

Given the unavailability of a permanent shrimp cell line, *Drosophila* S2 cells (Invitrogen, USA) were used to perform the functional studies of LvMyD88. The S2 cells were maintained at 28°C overnight in a *Drosophila* serum-free medium (SDM; Invitrogen, USA) supplemented with 10% fetal bovine serum (FBS) prior to DNA transfection. The plasmids were then

transfected with the Cellfectin II reagent (Invitrogen, USA) according to the manufacturer’s instructions. For the dual-luciferase reporter assays, the S2 cells cultured in 96-well plates (TPP, Switzerland) were transfected using 0.3 μg expression plasmids, 0.2 μg reporter gene plasmids, and 0.02 μg pRL-TK renilla luciferase plasmid (Promega, USA). The pRL-TK renilla luciferase plasmid was transfected alone as an internal control. Firefly and renilla luciferase activities were measured using a Dual-Luciferase Reporter Assay System (Promega, USA) according to the manufacturer’s instructions. All assays were performed in three independent transfections.

#### Statistical analysis

The student’s t-test was used to compare the means of two samples using Microsoft Excel wherever applicable. In all cases, differences were considered significant at  $p < 0.05$ . All experiments

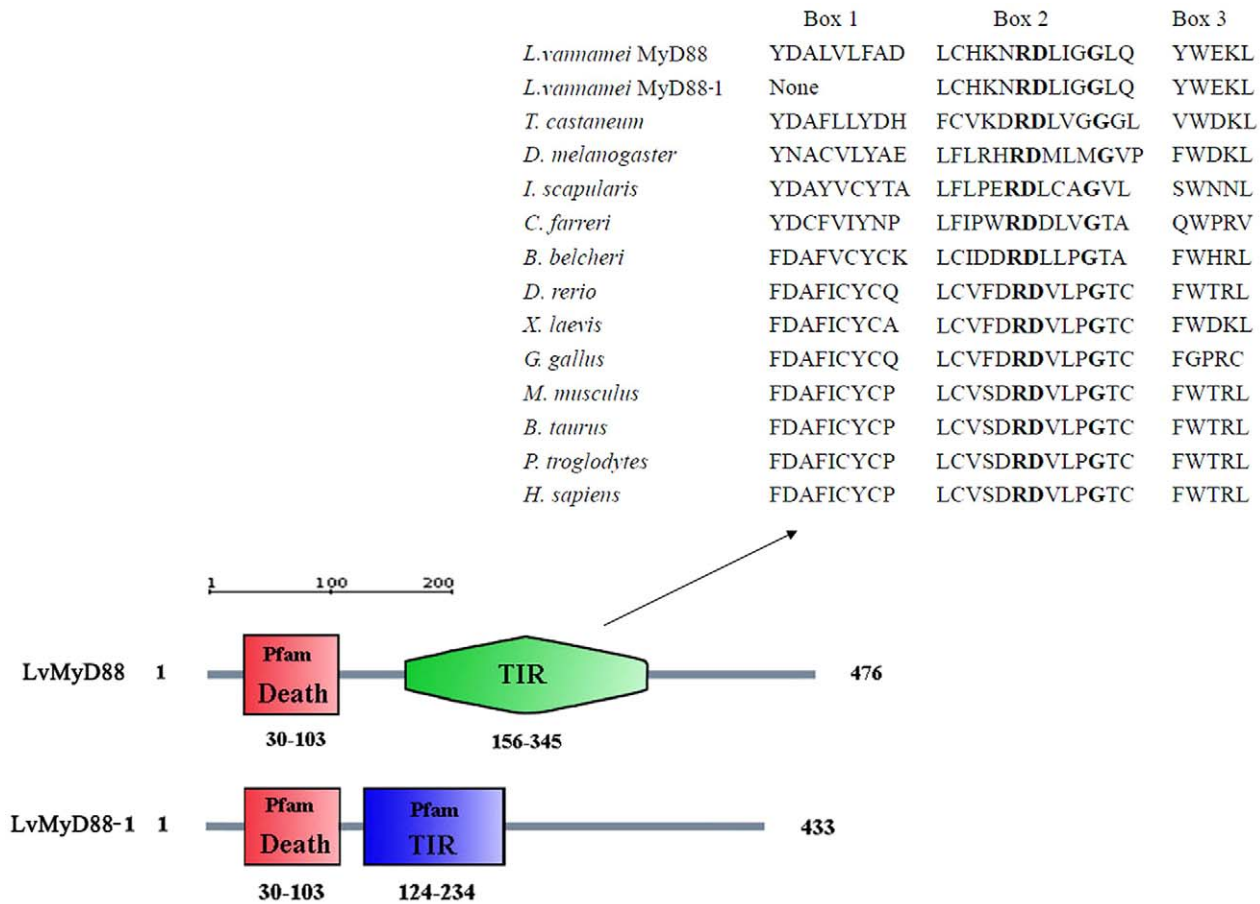

**Figure 3. Schematic description of the domain topologies of LvMyD88 and LvMyD88-1.** LvMyD88 and LvMyD88-1 contain the same N-terminal Death domains (residues 30–103) and different C-terminal TIR domains (residues 156–345 and 124–234, respectively). The TIR domains from *L. vannamei* with other species were shown. doi:10.1371/journal.pone.0047038.g003

were repeated at least three times. The data are presented as the mean ± standard error (standard error of the mean, SEM).

**Results**

**cDNA cloning and bioinformatics analysis of LvMyD88**

Two LvMyD88 variants, namely, LvMyD88 and LvMyD88-1, were found in *L. vannamei*. The full length cDNA of LvMyD88 comprises 1,848 bp with an ORF of 1,428 bp, an 11 bp 5' untranslated region, and a 409 bp 3' untranslated region (Fig. 1A). The full length cDNA of LvMyD88-1 contains 1,719 bp with an ORF of 1,299 bp, an 11 bp 5' untranslated region, and a 409 bp untranslated region (Fig. 1B). The deduced amino acid sequence of LvMyD88-1 displays 91% identity with LvMyD88. The genomic sequence of LvMyD88 was also obtained, exhibiting a genomic organization which is different to that of the MyD88 genes from *Drosophila*, zebrafish, chicken, mouse, and human. The LvMyD88 genes consist of 7 exons and 6 introns whilst other known MyD88 genes have 5 exons and 4 introns (Fig. 2). Analysis of genome sequences showed that all the exon-intron boundaries in LvMyD88 conform to the consensus GT/AG rule for splicing [47]. However, neither splice donor consensus (GT) nor splice acceptor consensus (AG) was found in the sequences missing in LvMyD88-1. The sequences were deposited in the NCBI

GenBank under Accession No. JX073566, No. JX073567 and No. JX073568.

To determine the structural domains of LvMyD88, the amino acid sequence was analyzed using the SMART program. LvMyD88 and LvMyD88-1 possess an identical death domain at the N terminus but different C-terminal TIR domains. Three highly conserved regions (Box1, Box2, and Box3) present in most TIR domains were found in LvMyD88. However, the Box1 region was absent in LvMyD88-1. The RDXΦ1Φ2G motif where X represents any amino acid and Φ represents a hydrophobic residue is known to be essential for the interaction of TLRs with MyD88 [48]. This motif can be found in the Box2 of LvMyD88 and LvMyD88-1 (Fig. 3).

The NCBI BLAST search tool and pairwise ClustalW2 program were used to calculate the percentage of amino acid identity among MyD88s. The LvMyD88s had highest sequence identity (80%) with *Xenopus laevis* MyD88 (Table 2), and 50%, 31% and 43% sequence identity with the MyD88s from three invertebrate species, *T. castaneum*, *D. melanogaster* and *Ixodes scapularis*, respectively. In addition, a phylogenetic tree was constructed to determine the evolutionary relationship of LvMyD88 with other known MyD88 family members, showing that LvMyD88 belonged to the invertebrate group and was closely related to *T. castaneum* MyD88 (Fig. 4).

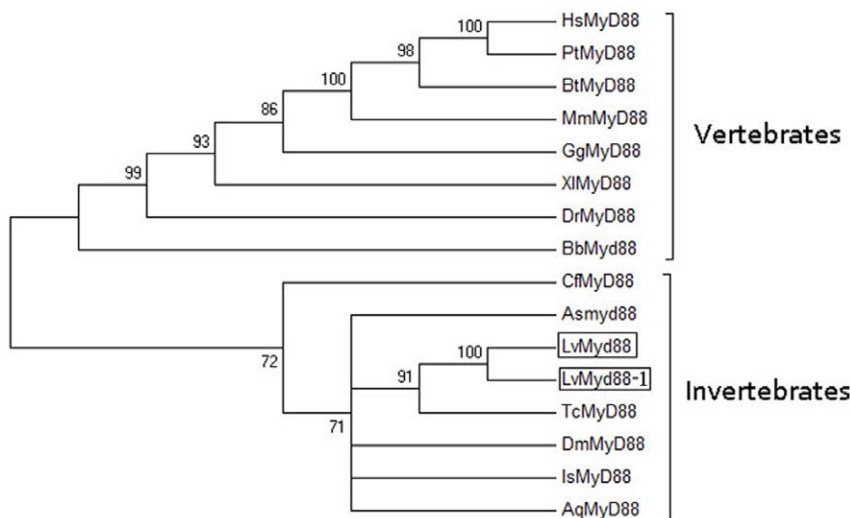

**Figure 4. Phylogenetic tree analysis.** A rooted tree was constructed via the neighbor-joining method and bootstrapped 1000 times using the MEGA 4.0 software (<http://www.megasoftware.net/index.html>). LvMyD88 is boxed. LvMyD88, *L. vannamei* MyD88 (Accession No. [JX073566](#)); LvMyD88-1, *L. vannamei* MyD88-1 (Accession No. [JX073567](#)); AqMyD88, *Amphimedon queenslandica* MyD88 (Accession No. [ADR78337](#)); AsMyD88, *Artemia sinica* MyD88 (Accession No. [AEJ08192](#)); BbMyD88, *Branchiostoma belcheri* MyD88 (Accession No. [ABQ32299](#)); BtMyD88, *Bos taurus* MyD88 (Accession No. [DAA17130](#)); CfMyD88, *Chlamys farreri* MyD88 (Accession No. [ABB76627](#)); DmMyD88, *Drosophila melanogaster* MyD88 (Accession No. [AAF58953](#)); DrMyD88, *Danio rerio* MyD88 (Accession No. [NP\\_997979.2](#)); GgMyD88, *Gallus gallus* MyD88 (Accession No. [NP\\_001026133](#)); HsMyD88, *Homo sapiens* MyD88 (Accession No. [AAC50954](#)); IsMyD88, *Ixodes scapularis* MyD88 (Accession No. [XP\\_002407372](#)); MmMyD88, *Mus musculus* MyD88 (Accession No. [AAC53013](#)); PtMyD88, *Pan troglodytes* MyD88 (Accession No. [NP\\_001123935](#)); TcMyD88, *Tribolium castaneum* MyD88 (Accession No. [EFA01304](#)); and XlMyD88, *Xenopus laevis* MyD88 (Accession No. [NP\\_001081001](#)). doi:10.1371/journal.pone.0047038.g004

**Tissue distribution of LvMyD88s in healthy *L. vannamei***

The constitutive expression of LvMyD88, LvMyD88-1 and LvMyD88s (the amount of LvMyD88 and LvMyD88-1) were confirmed by RT-PCR in all the examined tissues, including hepatopancreas, gill, muscle, intestine, pyloric caecum, epidermis, nerve, heart, stomach, eyestalk, seminal vesicle and hemocytes. LvMyD88s were expressed highest in hemocytes and lowest in

hepatopancreas. In general, the LvMyD88 expression level was higher than that of LvMyD88-1 in all tissues examined (Fig. 5).

**LvMyD88 expression in immune-challenged *L. vannamei***

Peptidoglycan (PGN) and lipoteichoic acid (LTA) in gram-positive bacteria can be recognized by TLR2 [10]. Poly I:C, LPS and CpG-ODN2006 are the ligands for TLR3, TLR4 and TLR9, respectively [11]. In this study, gram-positive bacteria *S. aureus*,

**Table 2.** Full-length amino acid sequence.

| Species                        | Accession number | Amina acids | Identity %  |     |     |
|--------------------------------|------------------|-------------|-------------|-----|-----|
|                                |                  |             | Full-length | DD  | TIR |
| <i>Tribolium castaneum</i>     | EFA01304         | 400         | 50%         | 41% | 42% |
| <i>Drosophila melanogaster</i> | AAF58953         | 537         | 31%         | 43% | 35% |
| <i>Ixodes scapularis</i>       | XP_002407372     | 364         | 43%         | 39% | 28% |
| <i>Chlamys farreri</i>         | ABB76627         | 367         | 40%         | 36% | 39% |
| <i>Branchiostoma belcheri</i>  | ABQ32299         | 295         | 42%         | 34% | 38% |
| <i>Xenopus laevis</i>          | NP_001081001     | 283         | 80%         | 32% | 36% |
| <i>Danio rerio</i>             | NP_997979.2      | 284         | 30%         | 33% | 35% |
| <i>Gallus gallus</i>           | NP_001026133     | 376         | 33%         | 34% | 38% |
| <i>Mus musculus</i>            | AAC53013         | 296         | 37%         | 29% | 36% |
| <i>Bos taurus</i>              | DAA17130         | 296         | 30%         | 28% | 37% |
| <i>Pan troglodytes</i>         | NP_001123935     | 296         | 31%         | 30% | 36% |
| <i>Homo sapiens</i>            | AAC50954         | 296         | 31%         | 30% | 36% |

Death domain (DD) and Toll/interleukin-1 receptor (TIR) domain identities of LvMyD88 with other species. doi:10.1371/journal.pone.0047038.t002

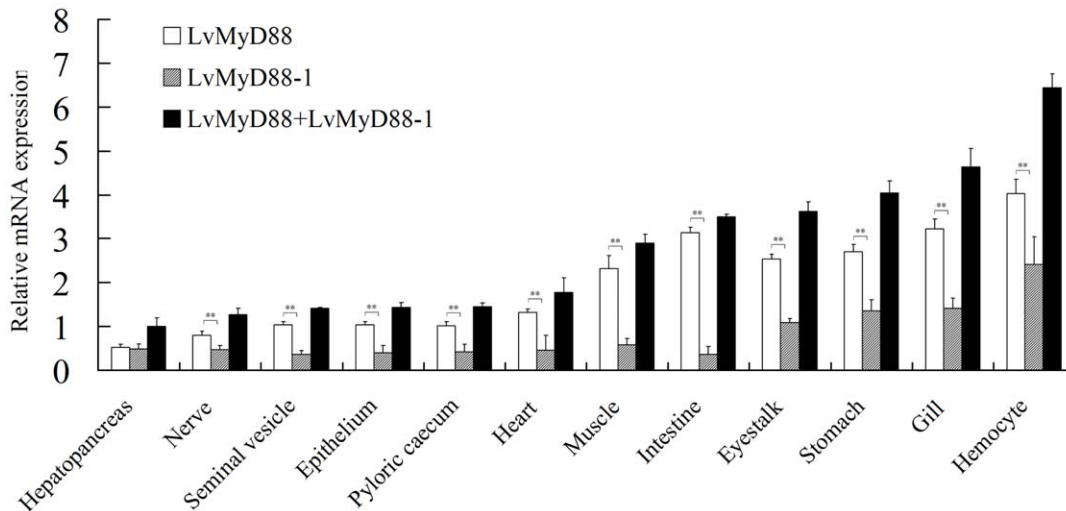

**Figure 5. Tissue distribution of LvMyD88 expression in healthy *L. vannamei*.** Ten animals were used for tissue sampling. LvEF1 $\alpha$  was used as the internal control to normalize the cDNA template used for real time PCR analysis. The data are presented as the mean  $\pm$  standard error (standard error of the mean, SEM) and  $p < 0.05$  is considered significantly different. doi:10.1371/journal.pone.0047038.g005

poly I:C, LPS and CpG-ODN2006 were chosen to challenge the *L. vannamei*. In addition, gram-negative pathogenic bacterium *V. parahaemolyticus* and one of the most common and most destructive viral pathogens (WSSV) in shrimp aquaculture were also used to for the challenge experiments [36]. Considering that LvMyD88s (the amount of LvMyD88 and LvMyD88-1) were expressed highly in hemocytes, we selected hemocytes to study LvMyD88s expression in response to immune challenges.

*S. aureus* challenge increased LvMyD88s transcripts. The LvMyD88s expression level reached its peak at 48 h post-injection and sharply increase to approx 15.3 times higher than that of the control [Fig. 6(a)]. After the LPS challenge, the level of LvMyD88 transcripts started to increase at 4 h and reached the peak at 24 h, with approx 5- folds increase compared with control [Fig. 6(b)]. In contrast, injection of poly I:C reduced gene expression at 8 h whilst induced gene expression at 12 h. Subsequently, the LvMyD88s expression recovered to the lower level than the control [Fig. 6(c)]. Injection of CpG-ODN2006 led to induced LvMyD88s expression at all time points [Figs. 6(d)]. Interestingly, LvMyD88 was downregulated at 4 and 8 h post-injection with *V. parahaemolyticus* but later upregulated [Fig. 6(e)]. Lastly, the WSSV infected group showed increased LvMyD88s expression when compared with the control group [Fig. 6(f)].

#### LvMyD88 activates *Drosophila* and shrimp AMP promoters

In *Drosophila* and shrimp, the AMPs are important immune factors and their expression is believed to be controlled mainly by the NF- $\kappa$ B signal pathway [39,40,45,46]. In shrimp, it has been reported that the NF- $\kappa$ B signal pathway can be activated by Toll, Pelle, TRAF6, Dorsal and Relish [37–42]. The present study has demonstrated that both LvMyD88 and LvMyD88-1 were able to activate the promoters of *Drosophila* and shrimp AMP genes. LvMyD88 induced the promoter activities of the *Drosophila* AMPs including AttA (2.54-fold), Drs (2.83-fold), and Mtk (2.23-fold), the *L. vannamei* AMP PEN4 (1.40-fold) and the *P. monodon* AMPs such

as PEN309 (3.55-fold), PEN453 (6.22-fold), and PEN536 (4.07-fold). Similar inducible effect was also detected for LvMyD88-1. It must be noted that LvMyD88-1 is more potent to drive the gene promoters of the *Drosophila* Mtk, *L. vannamei* PEN4, and *P. monodon* PEN309 and PEN536 than LvMyD88 (Fig. 7). All these data suggest that LvMyD88 may be involved in regulating NF- $\kappa$ B signaling.

#### LvMyD88 activates WSSV gene promoters

A previous study suggested that the wsv069 (ie1), wsv303, and wsv371 genes are upregulated upon activation of LvPelle and LvDorsal [28]. This study showed both LvMyD88 and LvMyD88-1 upregulate viral gene expression, suggesting potential interaction between viral proteins and the host MyD88/NF- $\kappa$ B pathway. Expression of both LvMyD88s resulted in elevated luciferase activities for all the viral gene promoters (Fig. 8), with LvMyD88-1 gave rise to higher promoter activities than LvMyD88.

#### Discussion

In panaeid shrimp, most of the components involved in the Toll pathway of *Drosophila* were identified [37–42]. However, the key adaptor protein co-ordinating the Toll pathway, MyD88, remains elusive. In this study, we cloned the MyD88 gene for the first time in panaeid shrimp, and discovered two variants of LvMyD88 (LvMyD88 and LvMyD88-1). Our data showed that both LvMyD88s were capable of inducing the expression of AMP genes in *Drosophila* and shrimp. Furthermore, overexpression of LvMyD88s may also promote viral gene expression.

MyD88 has been identified in both vertebrates and invertebrates. However, MyD88 variants have been found only in humans, mice and chicken [13,15,16]. Human and murine MyD88 gene contains five exons and four introns [21]. Alternative splicing of exon 2 leads to a protein lacking the inhibitor of DNA (ID) domain usually found between DD and TIR domains [29,30]. Additional splicing variant of human MyD88 is *EXC09* which lacks 19 bp in nucleotides 659–677 [13]. In chicken, MyD88

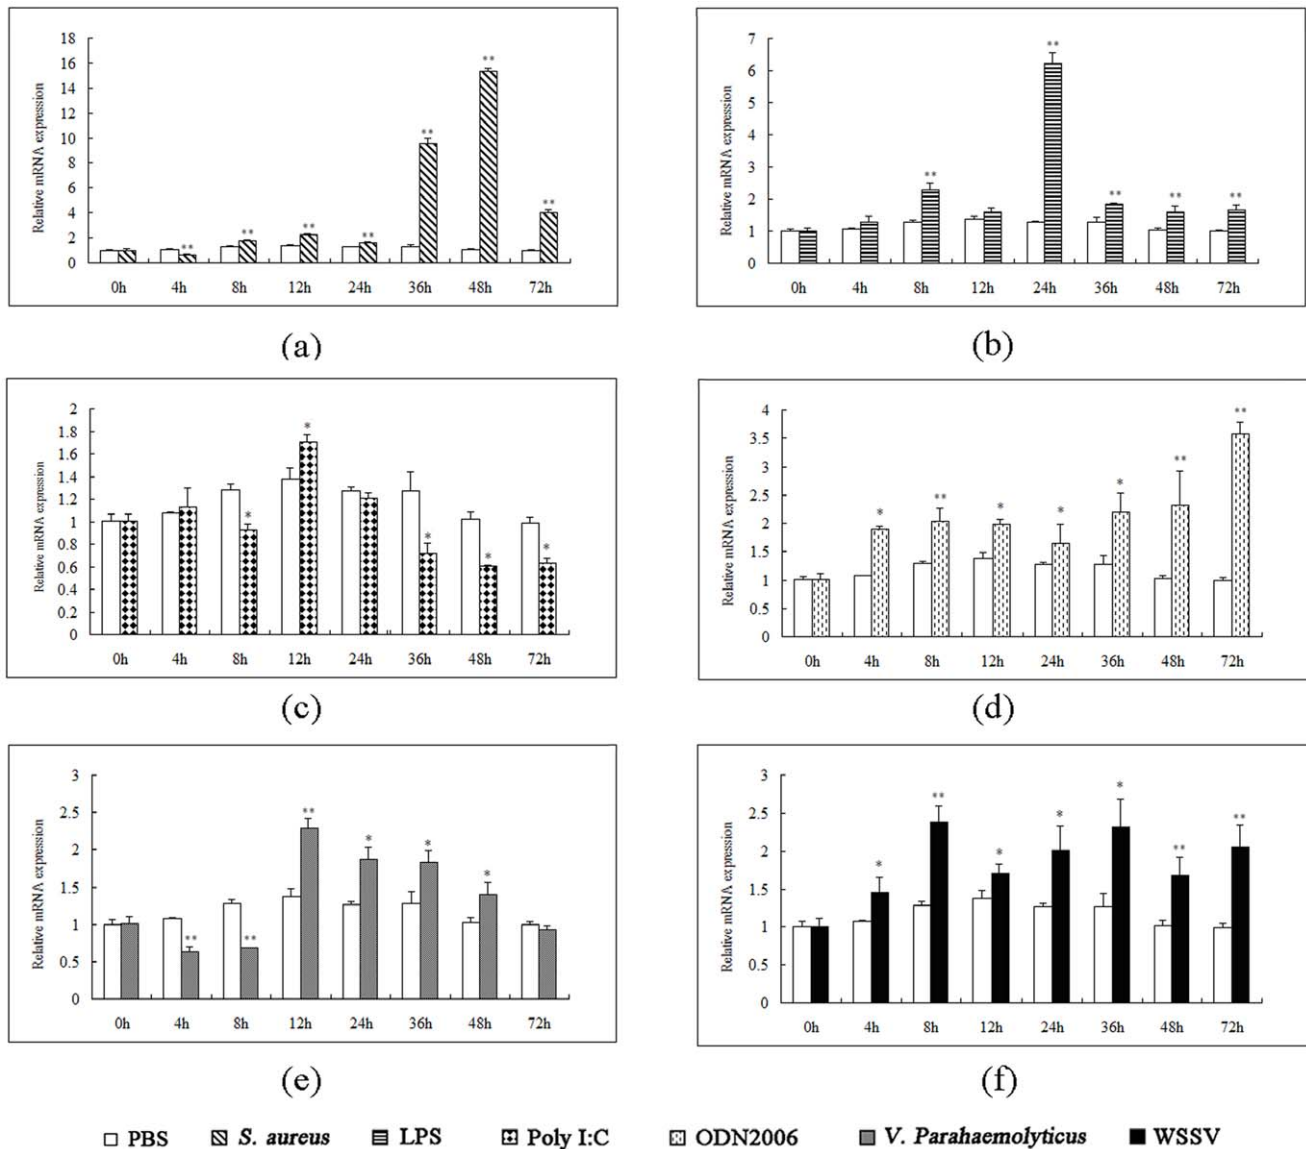

**Figure 6. Temporal expression of LvMyD88 in immune-challenged *L. vannamei*.** The relative expression level of target genes was normalized to LvEF1a. The relative expression of LvMyD88 in treated groups [(a) *Staphylococcus aureus*, (b) lipopolysaccharide (LPS), (c) poly I:C, (d) CpG-ODN2006, (e) *Vibrio parahaemolyticus* and, (f) white spot syndrome virus (WSSV)] were compared with the control group. The results were based on three independent experiments and expressed as mean values  $\pm$  SD. The statistical significance was calculated using Student's *t*-test (\* indicates  $p < 0.05$  and \*\* indicates  $p < 0.01$  compared with control). doi:10.1371/journal.pone.0047038.g006

variants were not generated from alternative splicing of MyD88 pre-mRNA [16]. Chicken MyD88-2 had a single nucleotide deletion at position 859, which resulted in a protein with 77 aa residues shorter than MyD88-1, the wild type of MyD88 with 376 amino acids. Chicken MyD88-3 had a 8 aa deletion at the N terminus [18]. In this study, two MyD88 variants have been found for the first time in an invertebrate species *L. vannamei*. Sequences analysis showed that the LvMyD88 conformed to the consensus GT/AG rule for splicing but LvMyD88-1 did not [47]. It is likely that the difference between LvMyD88 and LvMyD88-1 is due to alternative splicing utilizing a non-canonical splice site. However,

we do not know how LvMyD88-1 generated according to the present results. Future studies are needed.

The two LvMyD88 variants were constitutively expressed in *L. vannamei*. Previous studies showed that MyD88 expression was changed after activation of TLR signaling both in vertebrate and invertebrate. Rock bream MyD88 has been shown to become up-regulated in blood, spleen and head kidney in response to experimental challenge with LPS and *Edwardsiella tarda* [26]. In Japanese flounder peripheral blood leukocytes, MyD88 was also found to be strongly up-regulated in response to experimental exposure to LPS, PGN, and poly I:C [21]. In scallop, MyD88 was



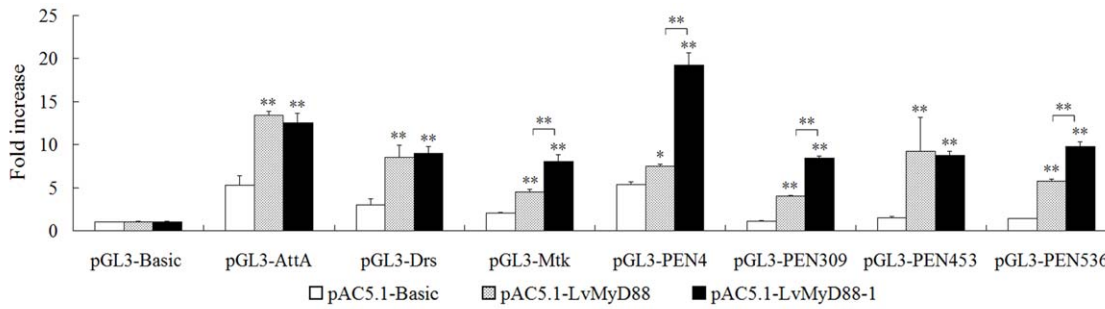

**Figure 7. Effects of LvMyD88 and LvMyD88-1 on the promoter activities of *Drosophila* and shrimp antimicrobial peptide genes (AMPs) in *Drosophila* S2 cells.** *Drosophila* S2 cells were transfected with the protein expression vector (pAC5.1 empty vector, LvMyD88, or LvMyD88-1), the reporter gene plasmid (pGL3-Basic, pGL3-AttA, pGL3-Drs, pGL3-Mtk, pGL3-PEN4, pGL3-PEN309, pGL3-PEN453, or pGL3-PEN536), and the pRL-TK Renilla luciferase plasmid (as an internal control; Promega, USA). After 48 h, the cells were harvested for measurement of luciferase activity using the dual-luciferase reporter assay system (Promega, USA). All data are representative of three independent experiments. The bars indicate the mean  $\pm$  SD of the luciferase activity ( $n=3$ ). The statistical significance was calculated using Student's *t*-test (\* indicates  $p<0.05$  and \*\* indicates  $p<0.01$  compared with control). doi:10.1371/journal.pone.0047038.g007

up-regulated in primary cultured hemocytes after LPS and PGN treatment [27]. To better understand the roles of LvMyD88 in response to exposure to various potential pathogens in *L. vannamei*, the expression of LvMyD88 was investigated in hemocytes after stimulation with the ligands of different TLRs, gram-negative bacterium *V. parahaemolyticus*, gram-positive bacterium *S. aureus* and viral pathogen WSSV. After poly I:C stimulation, the transcriptional level of the LvMyD88 was lower than that of the control group at all time points except 4 h and 12 h. LvMyD88 was up-regulated after stimulation with LPS and CpG-ODN2006, *V. parahaemolyticus*, *S. aureus* and WSSV. Particularly, LvMyD88 were strongly upregulated after LPS and *S. aureus* challenged. It is plausible that the obvious differences in the responses in terms of MyD88 protein levels were probably due to the differences in the TLRs involved in recognizing the different PAMPs involved in each stimulation experiment. All the results suggested that LvMyD88 may play a role in innate immune in *L. vannamei*.

In *Drosophila*, it is known that the Toll pathway is central to host anti-bacterial and anti-viral response by regulating the expression of the immune related genes, including AMPs [48–50]. Similarly,

in shrimp, AMP genes including Penaeidin, Crustin and antilipoplysaccharide factors (ALFs), are induced after bacterial and viral infection [51,52]. Like their *Drosophila* counterparts, expression of shrimp AMPs is controlled by the Toll pathway through the conserved transcription factors such as NF- $\kappa$ B, GATA and AP-1 [52,53]. In this study, LvMyD88 increased the promoter activities of several *Drosophila* and shrimp AMP genes in *Drosophila* S2 cells. Interestingly, LvMyD88 also enhanced the expression of wsv069 (ie1), wsv303, and wsv371, functioning as LvPelle and wsv449 (Fig. 8) [37]. All the results suggested that LvMyD88 may play the role in anti-bacterial and anti-viral response through the Toll pathway.

In summary, this study of LvMyD88 in *L. vannamei* supported the view that an evolutionarily conserved TLR/MyD88/Tube/Pelle/TRAF6/NF- $\kappa$ B signaling pathway may exist in shrimp [37]. It may help better understand the innate immune pathway in shrimp, which would be beneficial to the prevention of various diseases in shrimp culture, and provide valuable information for the study of origin and evolution of innate immunity.

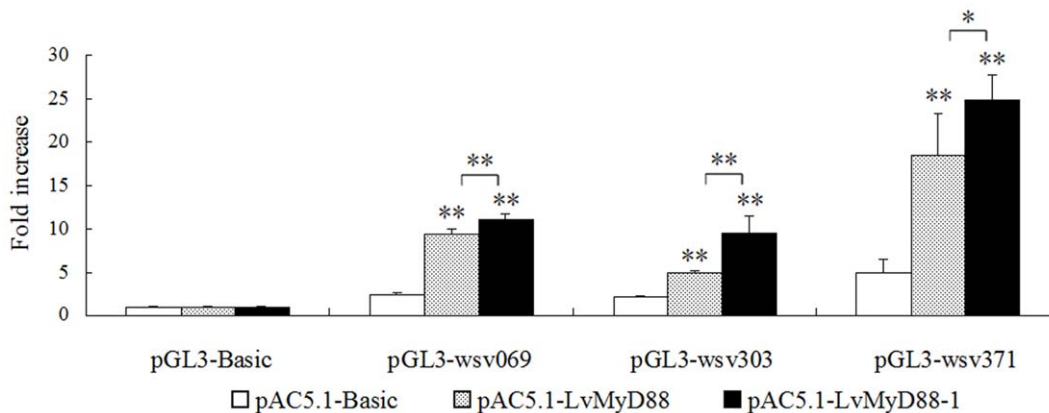

**Figure 8. Overexpression of LvMyD88 and LvMyD88-1 activate viral gene expression.** The S2 cells were transfected with 0.3  $\mu$ g of the protein expression vector (pAC5.1 empty vector, LvMyD88, or LvMyD88-1), the reporter gene plasmid (pGL3-Basic, pGL3-wsv069, pGL3-wsv303, or pGL3-wsv371) and the pRL-TK Renilla luciferase plasmid (as an internal control; Promega, USA). At 48 h after transfection, the cells were harvested and analyzed using the dual-luciferase reporter assay system (Promega, USA). All data are representative of three independent experiments. The bars indicate the mean  $\pm$  SD of the luciferase activity ( $n=3$ ). The statistical significance was calculated using Student's *t*-test (\* indicates  $p<0.05$  and \*\* indicates  $p<0.01$  compared with the control). doi:10.1371/journal.pone.0047038.g008

## Acknowledgments

The authors thank Dr. Jun Zou from Scottish Fish Immunology Research Centre in University of Aberdeen for his modification of the whole text.

## References

- Akira S, Uematsu S, Takeuchi O (2006) Pathogen recognition and innate immunity. *Cell* 124: 783–801.
- Medzhitov R, Janeway C Jr (2000) Innate immune recognition: mechanisms and pathways. *Immunol Rev* 173: 89–97.
- Kawai T, Akira S (2011) Toll-like receptors and their crosstalk with other innate receptors in infection and immunity. *Immunity* 34: 637.
- Moresco EM, LaVine D, Beutler B (2011) Toll-like receptors. *Curr Biol* 21: R488–493.
- Silverman N, Maniatis T (2001) NF- $\kappa$ B signaling pathways in mammalian and insect innate immunity. *Genes Dev* 15: 2321–2342.
- Kenny EF, O'Neill LAJ (2008) Signalling adaptors used by Toll-like receptors: an update. *Cytokine* 43: 342–349.
- O'Neill LA, Bowie AG (2007) The family of five: TIR-domain-containing adaptors in Toll-like receptor signalling. *Nat Rev Immunol* 7: 353–364.
- Janssens S, Beyaert R (2002) A universal role for MyD88 in TLR/IL-1R-mediated signaling. *Trends Biochem Sci* 27: 474–482.
- Kawai T, Akira S (2007) Signaling to NF- $\kappa$ B by Toll-like receptors. *Trends in molecular medicine* 13: 460–469.
- Akira S, Takeda K (2004) Toll-like receptor signalling. *Nature Reviews Immunology* 4: 499–511.
- West AP, Koblansky AA, Ghosh S (2006) Recognition and signaling by toll-like receptors. *Annu Rev Cell Dev Biol* 22: 409–437.
- Lord KA, Hoffmann-Liebermann B, Liebermann DA (1990) Nucleotide sequence and expression of a cDNA encoding MyD88, a novel myeloid differentiation primary response gene induced by IL6. *Oncogene* 5: 1095–1097.
- Bonnert TP, Garka KE, Parnet P, Sonoda G, Testa JR, et al. (1997) The cloning and characterization of human MyD88: a member of an IL-1 receptor related family. *FEBS Lett* 402: 81–84.
- Tohno M, Shimazu T, Aso H, Kawai Y, Saito T, et al. (2007) Molecular cloning and functional characterization of porcine MyD88 essential for TLR signaling. *Cell Mol Immunol* 4: 369–376.
- Strausberg RL, Feingold EA, Grouse LH, Derge JG, Klausner RD, et al. (2002) Generation and initial analysis of more than 15,000 full-length human and mouse cDNA sequences. *Proc Natl Acad Sci U S A* 99: 16899.
- Wheaton S, Lambourne MD, Sarson AJ, Brisbin JT, Mayamei A, et al. (2007) Molecular cloning and expression analysis of chicken MyD88 and TRIF genes. *DNA Seq* 18: 480–486.
- Prothmann C, Armstrong NJ, Rupp RAW (2000) The Toll/IL-1 receptor binding protein MyD88 is required for Xenopus axis formation. *Mechanisms of Development* 97: 85–92.
- Li X, Zhu B, Chen N, Hu H, Chen J, et al. (2011) Molecular characterization and functional analysis of MyD88 in Chinese soft-shelled turtle *Trionyx sinensis*. *Fish Shellfish Immunol* 30: 33–38.
- van der Sar AM, Stockhammer OW, van der Laan C, Spaik HP, Bitter W, et al. (2006) MyD88 innate immune function in a zebrafish embryo infection model. *Infect Immun* 74: 2436–2441.
- Meijer AH, Gabby Krens SF, Medina Rodriguez IA, He S, Bitter W, et al. (2004) Expression analysis of the Toll-like receptor and TIR domain adaptor families of zebrafish. *Mol Immunol* 40: 773–783.
- Takano T, Kondo H, Hirono I, Saito-Taki T, Endo M, et al. (2006) Identification and characterization of a myeloid differentiation factor 88 (MyD88) cDNA and gene in Japanese flounder, *Paralichthys olivaceus*. *Dev Comp Immunol* 30: 807–816.
- Yao CL, Kong P, Wang ZY, Ji PF, Liu XD, et al. (2009) Molecular cloning and expression of MyD88 in large yellow croaker, *Pseudosciaena crocea*. *Fish Shellfish Immunol* 26: 249–255.
- Rebl A, Goldammer T, Fischer U, Kollner B, Seyfert HM (2009) Characterization of two key molecules of teleost innate immunity from rainbow trout (*Oncorhynchus mykiss*): MyD88 and SAA. *Vet Immunol Immunopathol* 131: 122–126.
- Skjaeveland I, Iliev DB, Strandkog G, Jorgensen JB (2009) Identification and characterization of TLR3 and MyD88 homologs in Atlantic salmon (*Salmo salar*). *Dev Comp Immunol* 33: 1011–1017.
- Kongchum P, Hallerman EM, Hulata G, David L, Palti Y (2011) Molecular cloning, characterization and expression analysis of TLR9, MyD88 and TRAF6 genes in common carp (*Cyprinus carpio*). *Fish Shellfish Immunol* 30: 361–371.
- Whang I, Lee Y, Kim H, Jung SJ, Oh MJ, et al. (2011) Characterization and expression analysis of the myeloid differentiation factor 88 (MyD88) in rock bream *Oplegnathus fasciatus*. *Mol Biol Rep* 38: 3911–3920.
- Qiu L, Song L, Yu Y, Xu W, Ni D, et al. (2007) Identification and characterization of a myeloid differentiation factor 88 (MyD88) cDNA from Zhikong scallop *Chlamys farreri*. *Fish Shellfish Immunol* 23: 614–623.

## Author Contributions

Conceived and designed the experiments: SZ J-GH. Performed the experiments: SZ. Analyzed the data: SZ. Contributed reagents/materials/analysis tools: SZ C-ZL HY WQ Y-GC P-HW S-PW. Wrote the paper: SZ J-GH.

- Tauszig-Delamasure S, Bilak H, Capovilla M, Hoffmann JA, Imler JL (2001) Drosophila MyD88 is required for the response to fungal and Gram-positive bacterial infections. *Nature immunology* 3: 91–97.
- Hardiman G, Rock FL, Balasubramanian S, Kastelein RA, Bazan JF (1996) Molecular characterization and molecular analysis of human MyD88. *Oncogene* 13: 2467–2475.
- Janssens S, Burns K, Tschopp J, Beyaert R (2002) Regulation of interleukin-1 and lipopolysaccharide-induced NF- $\kappa$ B activation by alternative splicing of MyD88. *Curr Biol* 12: 467–471.
- McTaggart SJ, Obbard DJ, Conlon C, Little TJ (2012) Immune genes undergo more adaptive evolution than non-immune system genes in *Daphnia pulex*. *BMC Evolutionary Biology* 12: 63.
- Chang YS, Peng SE, Yu HT, Liu FC, Wang CH, et al. (2004) Genetic and phenotypic variations of isolates of shrimp Taura syndrome virus found in Penaeus monodon and Metapenaeus ensis in Taiwan. *Journal of General Virology* 85: 2963–2968.
- Bachère E (2000) Shrimp immunity and disease control. *Aquaculture* 191: 3–11.
- Lightner DV, Poulos BT, Tang-Nelson KF, Pantoja CR, Nunan LM, et al. (2006) Application of molecular diagnostic methods to penaeid shrimp diseases: advances of the past 10 years for control of viral diseases in farmed shrimp. *Dev Biol (Basel)* 126: 117–122; discussion 325–116.
- Lightner DV, Redman RM (2007) Opportunities for training in shrimp diseases. *Dev Biol (Basel)* 129: 137–146.
- Lin YR, Hung HC, Leu JH, Wang HC, Kou GH, et al. (2011) The Role of Aldehyde Dehydrogenase and Hsp70 in Suppression of White Spot Syndrome Virus Replication at High Temperature. *Journal of virology* 85: 3517–3525.
- Wang PH, Gu ZH, Wan DH, Zhang MY, Weng SP, et al. (2011) The shrimp NF- $\kappa$ B pathway is activated by white spot syndrome virus (WSSV) 449 to facilitate the expression of WSSV069 (ie1), WSSV303 and WSSV371. *PLoS One* 6: e24773.
- Yang LS, Yin ZX, Liao JX, Huang XD, Guo CJ, et al. (2007) A Toll receptor in shrimp. *Mol Immunol* 44: 1999–2008.
- Wang PH, Liang JP, Gu ZH, Wan DH, Weng SP, et al. (2012) Molecular cloning, characterization and expression analysis of two novel Tolls (LvToll2 and LvToll3) and three putative Spatzle-like Toll ligands (LvSpz1–3) from *Litopenaeus vannamei*. *Dev Comp Immunol* 36: 359–371.
- Wang PH, Wan DH, Gu ZH, Deng XX, Weng SP, et al. (2011) *Litopenaeus vannamei* tumor necrosis factor receptor-associated factor 6 (TRAF6) responds to *Vibrio alginolyticus* and white spot syndrome virus (WSSV) infection and activates antimicrobial peptide genes. *Dev Comp Immunol* 35: 105–114.
- Huang XD, Yin ZX, Jia XT, Liang JP, Ai HS, et al. (2010) Identification and functional study of a shrimp Dorsal homologue. *Dev Comp Immunol* 34: 107–113.
- Huang XD, Yin ZX, Liao JX, Wang PH, Yang LS, et al. (2009) Identification and functional study of a shrimp Relish homologue. *Fish Shellfish Immunol* 27: 230–238.
- Pfaffl MW (2001) A new mathematical model for relative quantification in real-time RT-PCR. *Nucleic acids research* 29: e45–e45.
- Ho SH, Song YL (2009) Cloning of penaeidin gene promoter in tiger shrimp (*Penaeus monodon*). *Fish Shellfish Immunol* 27: 73–77.
- O'Leary NA, Gross PS (2006) Genomic structure and transcriptional regulation of the penaeidin gene family from *Litopenaeus vannamei*. *Gene* 371: 75–83.
- Wang PH, Gu ZH, Huang XD, Liu BD, Deng XX, et al. (2009) An immune deficiency homolog from the white shrimp, *Litopenaeus vannamei*, activates antimicrobial peptide genes. *Mol Immunol* 46: 1897–1904.
- Sharp PA, Burge CB (1997) Classification of introns: U2-type or U12-type. *Cell* 91: 875–879.
- Xu Y, Tao X, Shen B, Hornig T, Medzhitov R, et al. (2000) Structural basis for signal transduction by the Toll/interleukin-1 receptor domains. *Nature* 408: 111–115.
- Wang XW, Tan NS, Ho B, Ding JL (2006) Evidence for the ancient origin of the NF- $\kappa$ B/I $\kappa$ B cascade: its archaic role in pathogen infection and immunity. *Proc Natl Acad Sci U S A* 103: 4204–4209.
- Fan ZH, Wang XW, Lu J, Ho B, Ding JL (2008) Elucidating the function of an ancient NF- $\kappa$ B p100 homologue, CrRelish, in antibacterial defense. *Infect Immun* 76: 664–670.
- Hoffmann JA (2003) The immune response of *Drosophila*. *Nature* 426: 33–38.
- Lemaitre B, Hoffmann J (2007) The host defense of *Drosophila melanogaster*. *Annu Rev Immunol* 25: 697–743.
- Amparyup P, Kondo H, Hirono I, Aoki T, Tassanakajon A (2008) Molecular cloning, genomic organization and recombinant expression of a crustin-like antimicrobial peptide from black tiger shrimp *Penaeus monodon*. *Mol Immunol* 45: 1085–1093.
